# Supplementary material for: Sn(ii)-doped one-dimensional hybrid metal halide [C5H14NO]CdCl3single crystals with broadband greenish-yellow light emission
Source: Royal Society of Chemistry journal article supplement (doi:10.1039/d2dt03697e), 2022-12-17
Supplement: d2dt03697e1.pdf [file d2dt03697e1.pdf]

Electronic Supporting Information

**Sn(II)-Doped One-Dimensional Hybrid  
Metal Halide [C<sub>5</sub>H<sub>14</sub>NO]CdCl<sub>3</sub> Single  
Crystals With Broadband Greenish-Yellow  
Light Emission.**

*Haiming Cheng,<sup>1a</sup> Chi Cao,<sup>1a</sup> Shiyong Teng,<sup>d</sup> Zhinan Zhang,<sup>a</sup> Ying Zhang,<sup>a</sup> Dayang Wang,<sup>a</sup> Wensheng Yang,<sup>abc</sup> and Renguo Xie<sup>\*a</sup>*

<sup>a</sup> State Key Laboratory of Inorganic Synthesis and Preparative Chemistry, College of Chemistry Jilin University, Changchun 130012, China.

<sup>b</sup> Engineering Center for Nanomaterials, Henan University, Kaifeng, 475004, China

<sup>c</sup> Institute of Molecular Plus, Tianjin University, Tianjin, 300072, China.

<sup>d</sup> First Hospital, Jilin University, Changchun 130021, China.

\*E-mail: [renguoxie@jlu.edu.cn](mailto:renguoxie@jlu.edu.cn)

## Table of contents

| Sections  | Titles                                                                                                                                                                                                                                                                               | Pages |
|-----------|--------------------------------------------------------------------------------------------------------------------------------------------------------------------------------------------------------------------------------------------------------------------------------------|-------|
| Table S1  | Crystal data and structure refinement for $[\text{C}_5\text{H}_{14}\text{NO}]\text{CdCl}_3$                                                                                                                                                                                          | S3    |
| Table S2  | Fractional atomic coordinates ( $\times 10^4$ ) and equivalent isotropic displacement parameters ( $\text{\AA}^2 \times 10^3$ ) for $[\text{C}_5\text{H}_{14}\text{NO}]\text{CdCl}_3$ . $U_{(\text{eq})}$ is defined as one third of the trace of the orthogonalized $U_{ij}$ tensor | S4    |
| Table S3  | Selected bond lengths ( $\text{\AA}$ ) and angles (deg) for $[\text{C}_5\text{H}_{14}\text{NO}]\text{CdCl}_3$                                                                                                                                                                        | S5    |
| Table S4  | The data of ICP-OES and the molar ratios of $[\text{C}_5\text{H}_{14}\text{NO}]\text{CdCl}_3:\text{xSn}^{2+}$ ( $0 \leq \text{x} \leq 0.25$ )                                                                                                                                        | S6    |
| Table S5  | Chromaticity coordinates of $[\text{C}_5\text{H}_{14}\text{NO}]\text{CdCl}_3:\text{Sn}^{2+}$ crystals at different temperatures when excited by 288nm UV light                                                                                                                       | S6    |
| Figure S1 | The photographs of $[\text{C}_5\text{H}_{14}\text{NO}]\text{CdCl}_3$ crystals were obtained by slow volatilization.                                                                                                                                                                  | S7    |
| Figure S2 | The asymmetric unit of compound $[\text{C}_5\text{H}_{14}\text{NO}]\text{CdCl}_3$                                                                                                                                                                                                    | S7    |
| Figure S3 | Powder X-ray diffraction (PXRD) patterns (left) and magnified PXRD patterns (right) of $[\text{C}_5\text{H}_{14}\text{NO}]\text{CdCl}_3:\text{Sn}^{2+}$                                                                                                                              | S7    |
| Figure S4 | The EDS spectrum of as-synthesized $[\text{C}_5\text{H}_{14}\text{NO}]\text{CdCl}_3:\text{xSn}^{2+}$ samples                                                                                                                                                                         | S8    |
| Figure S5 | A Tauc plot of the absorption measurements of the $[\text{C}_5\text{H}_{14}\text{NO}]\text{CdCl}_3$ and $[\text{C}_5\text{H}_{14}\text{NO}]\text{CdCl}_3:1.33\%\text{Sn}^{2+}$                                                                                                       | S8    |
| Figure S6 | Emission spectra of $\text{Sn}^{2+}$ -doped $[\text{C}_5\text{H}_{14}\text{NO}]\text{CdCl}_3$ samples at different temperatures                                                                                                                                                      | S8    |
| Figure S7 | Chromaticity coordinate diagram of $[\text{C}_5\text{H}_{14}\text{NO}]\text{CdCl}_3:1.33\%\text{Sn}^{2+}$ sample under different temperature conditions                                                                                                                              | S9    |
| Figure S8 | Charge densities of the VBM (e) and CBM (f) for $\text{Sn}^{2+}$ -doped $[\text{C}_5\text{H}_{14}\text{NO}]\text{CdCl}_3$                                                                                                                                                            | S9    |
| Figure S9 | The calculated partial DOS of (a) $[\text{C}_5\text{H}_{14}\text{NO}]\text{CdCl}_3$ and (b) $\text{Sn}^{2+}$ -doped $[\text{C}_5\text{H}_{14}\text{NO}]\text{CdCl}_3$                                                                                                                | S9    |

**Table S1.** Crystal data and structure refinement for [C<sub>5</sub>H<sub>14</sub>NO]CdCl<sub>3</sub>.

| Formula                                                                    | [C <sub>5</sub> H <sub>14</sub> NO]CdCl <sub>3</sub> |
|----------------------------------------------------------------------------|------------------------------------------------------|
| Formula mass                                                               | 322.92                                               |
| Crystal system                                                             | orthorhombic                                         |
| Space group                                                                | <i>Pna2<sub>1</sub></i>                              |
| <i>a</i> (Å)                                                               | 16.8879 (4)                                          |
| <i>b</i> (Å)                                                               | 8.1763 (2)                                           |
| <i>c</i> (Å)                                                               | 7.7975 (2)                                           |
| $\alpha$ (°)                                                               | 90                                                   |
| $\beta$ (°)                                                                | 90                                                   |
| $\gamma$ (°)                                                               | 90                                                   |
| <i>V</i> (Å <sup>3</sup> )                                                 | 1076.68 (5)                                          |
| <i>Z</i>                                                                   | 4                                                    |
| $\rho_{\text{calcd}}$ (g/cm <sup>3</sup> )                                 | 1.992                                                |
| Temperature (K)                                                            | 293                                                  |
| $\lambda$ (Å)                                                              | 0.71073                                              |
| <i>F</i> (000)                                                             | 632                                                  |
| $\mu$ (mm <sup>-1</sup> )                                                  | 2.72                                                 |
| <i>R</i> 1, <i>wR</i> 2 ( <i>I</i> > 2 $\sigma$ ( <i>I</i> )) <sup>a</sup> | 0.0175/0.0339                                        |
| GOF on <i>F</i> <sup>2</sup>                                               | -0.004(19)                                           |

**Table S2.** Fractional atomic coordinates ( $\times 10^4$ ) and equivalent isotropic displacement parameters ( $\text{\AA}^2 \times 10^3$ ) for  $[\text{C}_5\text{H}_{14}\text{NO}]\text{CdCl}_3$ .  $U_{\text{eq}}$  is defined as one third of the trace of the orthogonalized  $U_{ij}$  tensor.

| atom | x          | y         | z          | $U_{\text{eq}}$ ( $\text{\AA}^2$ ) |
|------|------------|-----------|------------|------------------------------------|
| Cd1  | 4903.5(2)  | 4835.6(2) | 4003.5(6)  | 26.37(7)                           |
| Cl1  | 4011.5(5)  | 2369.8(9) | 4580.6(9)  | 35.86(18)                          |
| Cl2  | 4246.0(4)  | 6502.7(9) | 6529.2(11) | 31.09(16)                          |
| Cl3  | 5968.8(4)  | 4119.6(9) | 6382.7(10) | 30.96(16)                          |
| O1   | 5632.1(13) | 7253(2)   | 3349(3)    | 31.0(5)                            |
| N1   | 6805.8(15) | 9500(3)   | 5155(3)    | 26.5(5)                            |
| C1   | 5456.6(17) | 8921(3)   | 3770(4)    | 29.7(7)                            |
| C2   | 5912.7(17) | 9476(4)   | 5323(4)    | 27.0(6)                            |
| C3   | 7134(2)    | 10360(4)  | 6692(5)    | 44.2(9)                            |
| C4   | 7058(2)    | 10392(5)  | 3581(5)    | 57.5(12)                           |
| C5   | 7140(2)    | 7809(4)   | 5157(5)    | 47.9(9)                            |

**Table S3.** Selected bond lengths (Å) and angles (deg) for [C<sub>5</sub>H<sub>14</sub>NO]CdCl<sub>3</sub>.

|                                        |             |                          |            |
|----------------------------------------|-------------|--------------------------|------------|
| Cd1—C11                                | 2.5566(7)   | O1—C1                    | 1.433(3)   |
| Cd1—Cl2 <sup>1</sup>                   | 2.6424(9)   | N1—C2                    | 1.514(4)   |
| Cd1—Cl2                                | 2.6400(9)   | N1—C3                    | 1.495(4)   |
| Cd1—Cl3                                | 2.6497(9)   | N1—C4                    | 1.490(4)   |
| Cd1—Cl3 <sup>1</sup>                   | 2.6601(9)   | N1—C5                    | 1.494(4)   |
| Cd1—O1                                 | 2.3838(19)  | C1—C2                    | 1.505(4)   |
| Cl1—Cd1—Cl2                            | 91.61(3)    | O1—Cd1—Cl3               | 89.01(6)   |
| Cl1—Cd1—Cl2 <sup>1</sup>               | 97.02(3)    | O1—Cd1—Cl3 <sup>1</sup>  | 81.66(6)   |
| Cl1—Cd1—Cl3 <sup>1</sup>               | 93.57(3)    | Cd1—Cl2—Cd1 <sup>2</sup> | 95.87(2)   |
| Cl1—Cd1—Cl3                            | 95.89(3)    | Cd1—Cl3—Cd1 <sup>2</sup> | 95.22(2)   |
| Cl2—Cd1—Cl2 <sup>1</sup>               | 170.783(9)  | C1—O1—Cd1                | 129.27(17) |
| Cl2 <sup>1</sup> —Cd1—Cl3 <sup>1</sup> | 82.71(3)    | C3—N1—C2                 | 107.8(2)   |
| Cl2—Cd1—Cl3 <sup>1</sup>               | 100.04(2)   | C4—N1—C2                 | 111.2(3)   |
| Cl2—Cd1—Cl3                            | 82.96(3)    | C4—N1—C3                 | 108.9(3)   |
| Cl2 <sup>1</sup> —Cd1—Cl3              | 92.90(2)    | C4—N1—C5                 | 110.2(3)   |
| Cl3—Cd1—Cl3 <sup>1</sup>               | 170.005(18) | C5—N1—C2                 | 111.4(2)   |
| O1—Cd1—C11                             | 174.73(6)   | C5—N1—C3                 | 107.1(2)   |
| O1—Cd1—Cl2 <sup>1</sup>                | 84.63(5)    | O1—C1—C2                 | 111.4(2)   |
| O1—Cd1—Cl2                             | 87.06(5)    | C1—C2—N1                 | 116.4(2)   |

Symmetry codes: (i) 1-X,1-Y,-1/2+Z; (ii) 1-X,1-Y,1/2

**Table S4.** The data of ICP-OES and the molar ratios of  $[\text{C}_5\text{H}_{14}\text{NO}]\text{CdCl}_3:\text{xSn}^{2+}$  ( $0 \leq \text{x} \leq 0.25$ )

| Sn / Cd precursors ratio (at%) | ICP-OES-determined | PLQY   |
|--------------------------------|--------------------|--------|
| 2%                             | 0.96%              | 41.07% |
| 5%                             | 1.12%              | 80.28% |
| 10%                            | 1.33%              | 91.27% |
| 15%                            | 1.76%              | 86.25% |
| 20%                            | 2.14%              | 83.30% |
| 25%                            | 2.3%               | 71.72% |

**Table S5.** Chromaticity coordinates of  $[\text{C}_5\text{H}_{14}\text{NO}]\text{CdCl}_3:\text{Sn}^{2+}$  crystals at different temperatures when excited by 288nm UV light.

| No. | Temperature (K) | Chromaticity coordinates (x, y) |
|-----|-----------------|---------------------------------|
| A   | 80              | 0.4632, 0.5011                  |
| B   | 110             | 0.4656, 0.5025                  |
| C   | 140             | 0.4415, 0.5144                  |
| D   | 170             | 0.4187, 0.5184                  |
| E   | 200             | 0.3790, 0.5181                  |
| F   | 230             | 0.3408, 0.5052                  |
| G   | 260             | 0.3282, 0.4886                  |
| H   | 290             | 0.3234, 0.4750                  |
| I   | 320             | 0.3212, 0.4615                  |

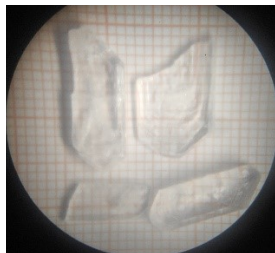

**Figure S1.** The photographs of  $[\text{C}_5\text{H}_{14}\text{NO}]\text{CdCl}_3$  crystals were obtained by slow volatilization.

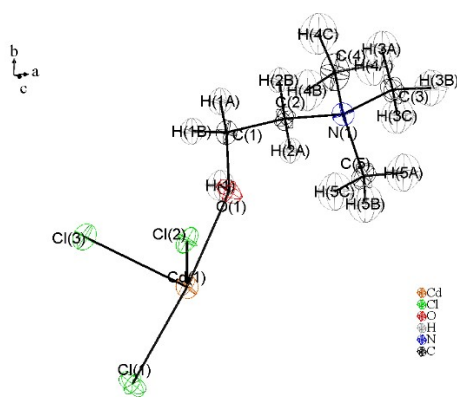

**Figure S2.** The asymmetric unit of compound  $[\text{C}_5\text{H}_{14}\text{NO}]\text{CdCl}_3$ .

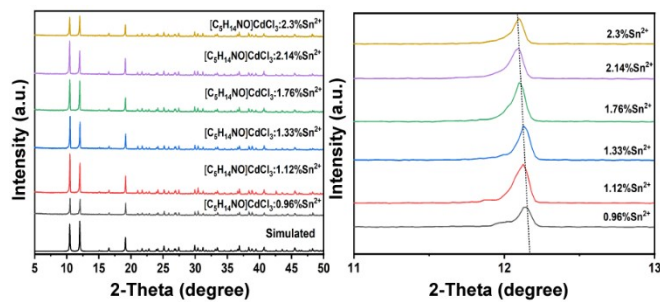

**Figure S3.** Powder X-ray diffraction (PXRD) patterns (left) and magnified PXRD patterns (right) of  $[\text{C}_5\text{H}_{14}\text{NO}]\text{CdCl}_3:\text{Sn}^{2+}$

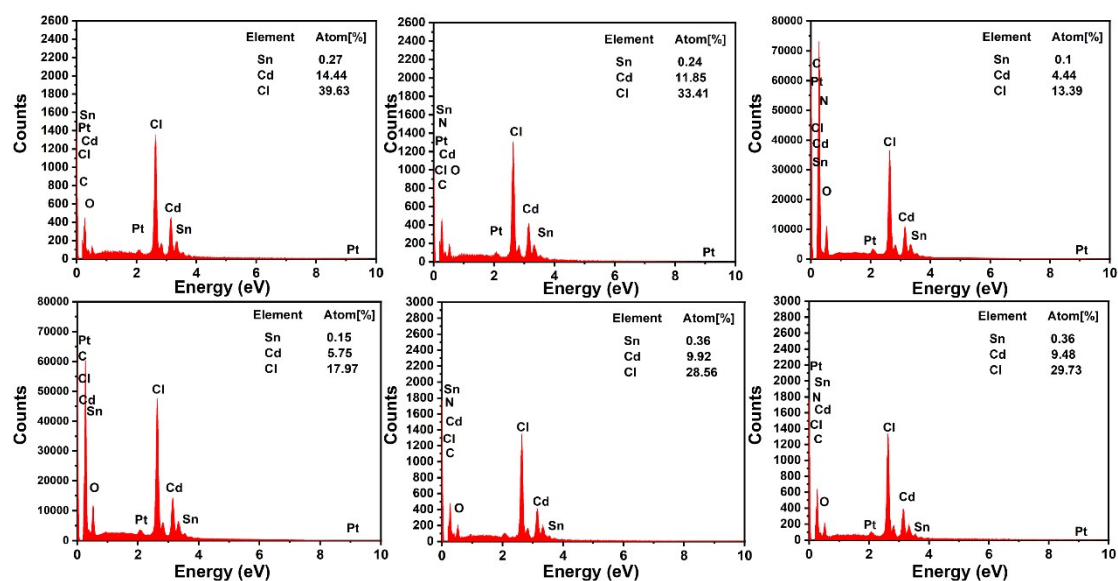

Figure S4. The EDS spectrum of as-synthesized  $[\text{C}_5\text{H}_{14}\text{NO}]\text{CdCl}_3:\text{xSn}^{2+}$  samples.

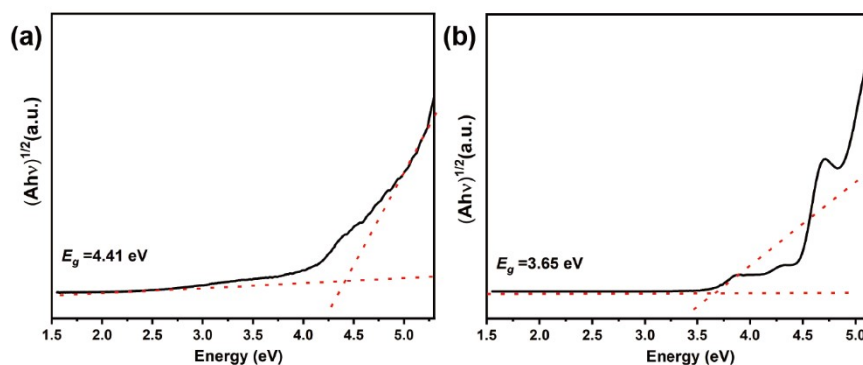

Figure S5. A Tauc plot of the absorption measurements of the  $[\text{C}_5\text{H}_{14}\text{NO}]\text{CdCl}_3$  and  $[\text{C}_5\text{H}_{14}\text{NO}]\text{CdCl}_3:1.33\%\text{Sn}^{2+}$ .

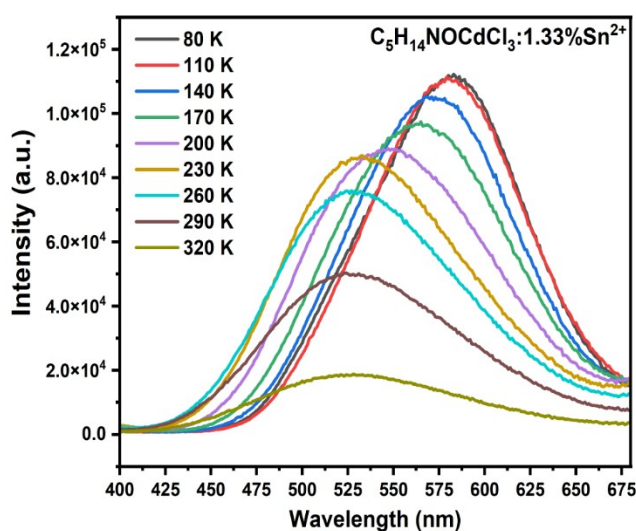

Figure S6. Emission spectra of  $\text{Sn}^{2+}$ -doped  $[\text{C}_5\text{H}_{14}\text{NO}]\text{CdCl}_3$  samples at different temperatures.



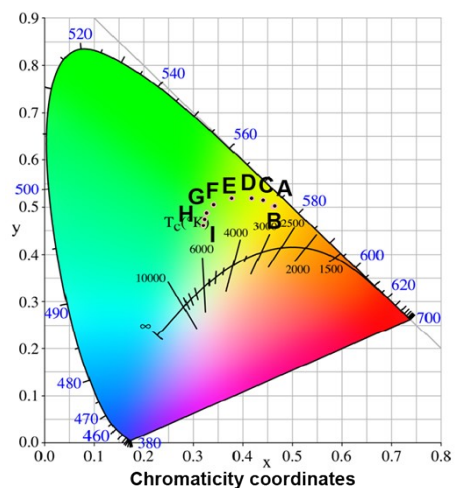

**Figure S7.** Chromaticity coordinate diagram of  $[\text{C}_5\text{H}_{14}\text{NO}]\text{CdCl}_3:1.33\%\text{Sn}^{2+}$  sample under different temperature conditions.

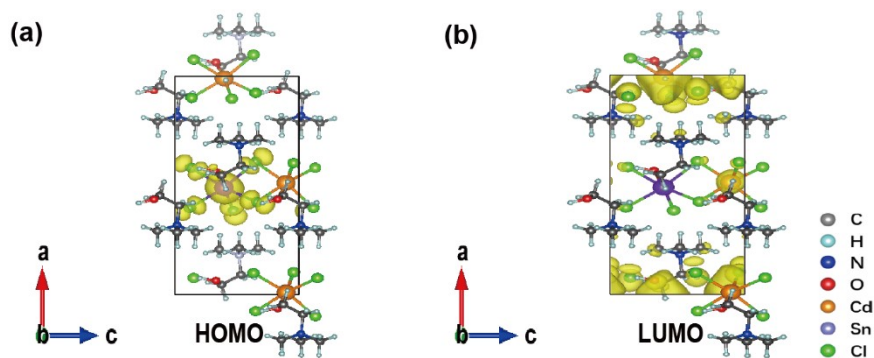

**Figure S8.** Charge densities of the VBM (a) and CBM (b) for  $\text{Sn}^{2+}$ -doped  $[\text{C}_5\text{H}_{14}\text{NO}]\text{CdCl}_3$ .

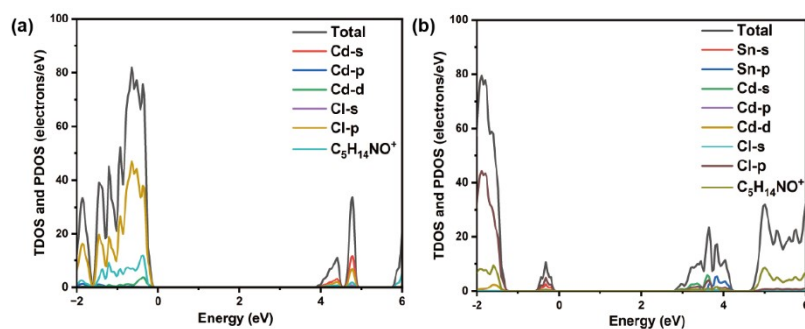

**Figure S9.** The calculated partial DOS of (a)  $[\text{C}_5\text{H}_{14}\text{NO}]\text{CdCl}_3$  and (b)  $\text{Sn}^{2+}$ -doped  $[\text{C}_5\text{H}_{14}\text{NO}]\text{CdCl}_3$ .
